# Supplementary material for: Pulcherrimin protects Bacillus subtilis against oxidative stress during biofilm development
Source: PubMed Central journal article supplement (PMC10356805; doi:10.1038/s41522-023-00418-z), 2023-07-19
Supplement: 41522_2023_418_MOESM2_ESM.pdf [file 41522_2023_418_MOESM2_ESM.pdf]

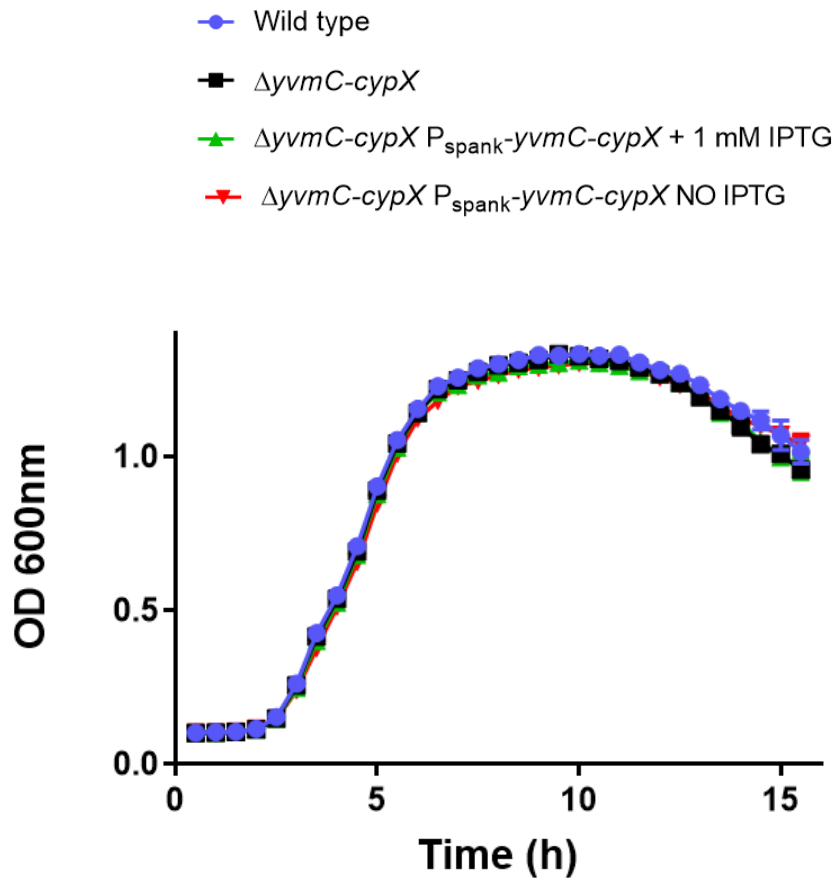

**Supplemental Figure 1: Loss or overexpression of pulcherrimin biosynthesis genes does not affect cell growth of *B. subtilis*.**

Growth of the wild type, pulcherrimin mutant and complementation strain in LB broth with or without IPTG supplementation at 1mM was accessed in a 96-well plate for 16 hours at 37°C. Experiment was performed with 8 technical replicates and average OD<sub>600</sub> nm values were plotted using Graphpad Prism 9. Error bars correspond to standard deviation.

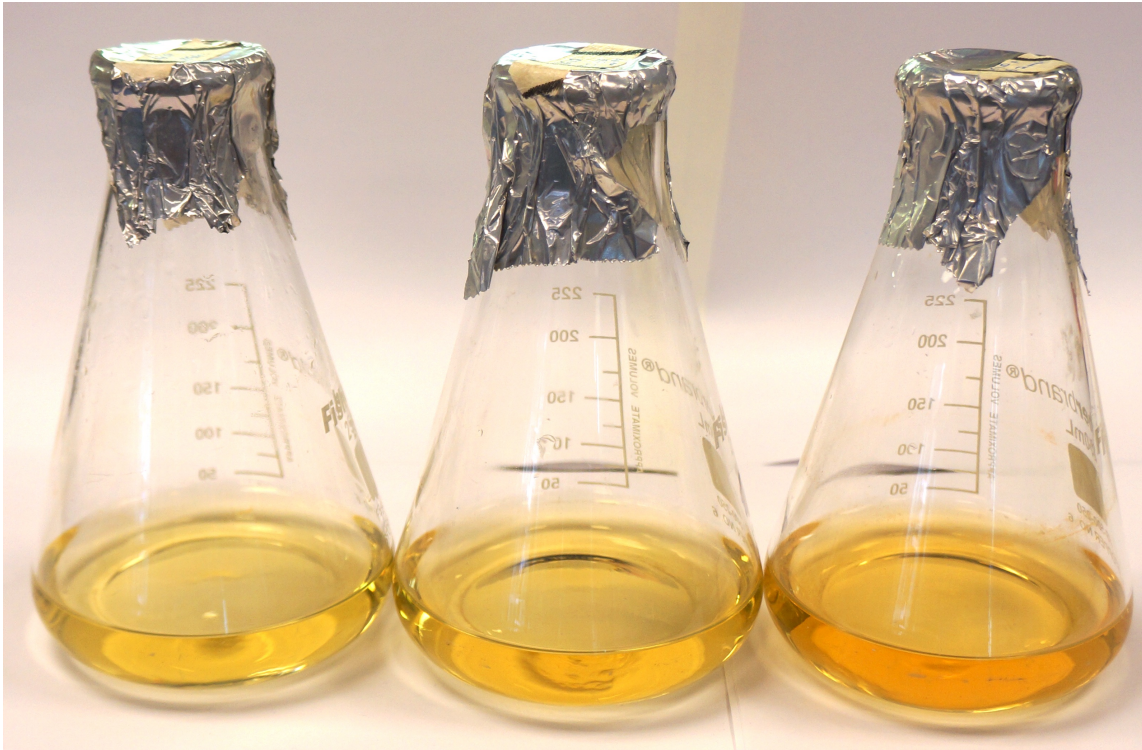

**Regular LBGm**

**+0.05 mM FeCl<sub>3</sub>**

**+0.2 mM FeCl<sub>3</sub>**

**Supplemental Figure 2: FeCl<sub>3</sub> supplementation does not alter the color of LBGm broth.** LBGm broth was prepared and aliquoted into 3 separate flasks. The first flask (left) did not have FeCl<sub>3</sub> added, the second flask (middle) had FeCl<sub>3</sub> added to a final concentration of 0.05 mM, and the third flask (right), to 0.2 mM. The broth color did not significantly change after FeCl<sub>3</sub> supplementation.

**Figure S2**

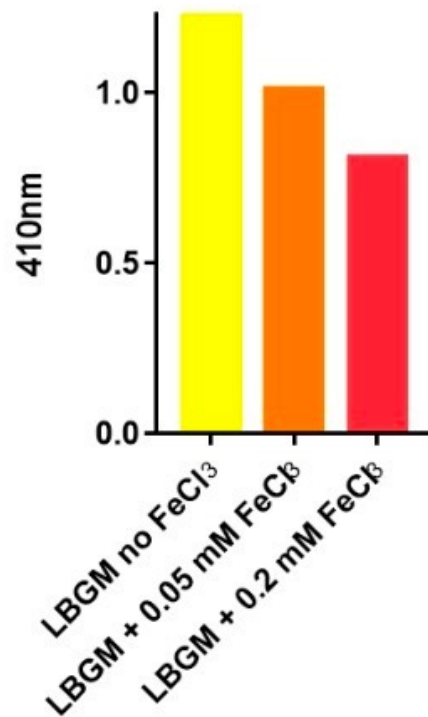

**Supplemental Figure 3: The amount of pulcherriminic acid in the supernatant decreases with increasing FeCl<sub>3</sub> supplementation.** Bar graphs represent values after quantification of total pulcherriminic acid from spent supernatants from overnight cultures of the wild-type strain with no FeCl<sub>3</sub> supplementation, 0.05 mM, and 0.2 mM FeCl<sub>3</sub>. 410 nm values were plotted using Graphpad Prism 9.

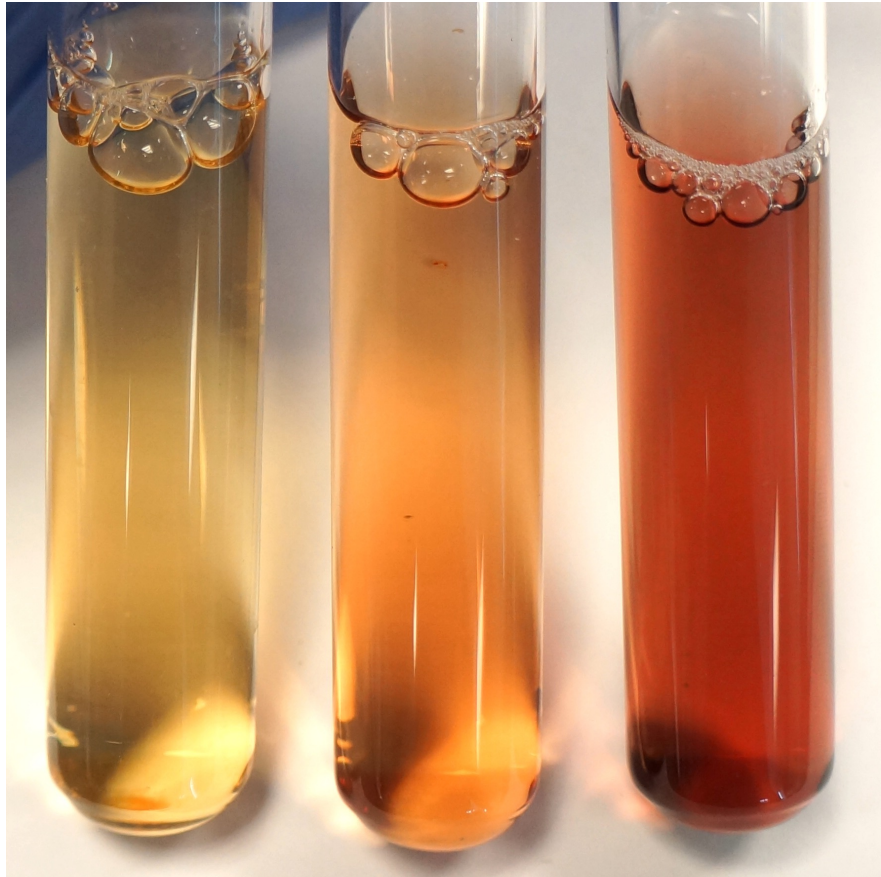

No addition    +0.05 mM FeCl<sub>3</sub>    +0.2 mM FeCl<sub>3</sub>

---

Wild-type spent supernatants

**Supplemental Figure 4: Addition of FeCl<sub>3</sub> to wild-type pellicle spent supernatants leads to conversion of pulcherriminic acid into the reddish-brown pigment pulcherrimin.** Images obtained from a 3-days old wild-type pellicle filtered supernatant without FeCl<sub>3</sub> added (left), or supplemented with FeCl<sub>3</sub> to a final concentration of 0.05 mM (middle) or 0.2 mM (right). The supernatant turns from light yellow to a reddish-brown color (corresponding to pulcherrimin) once FeCl<sub>3</sub> is added.

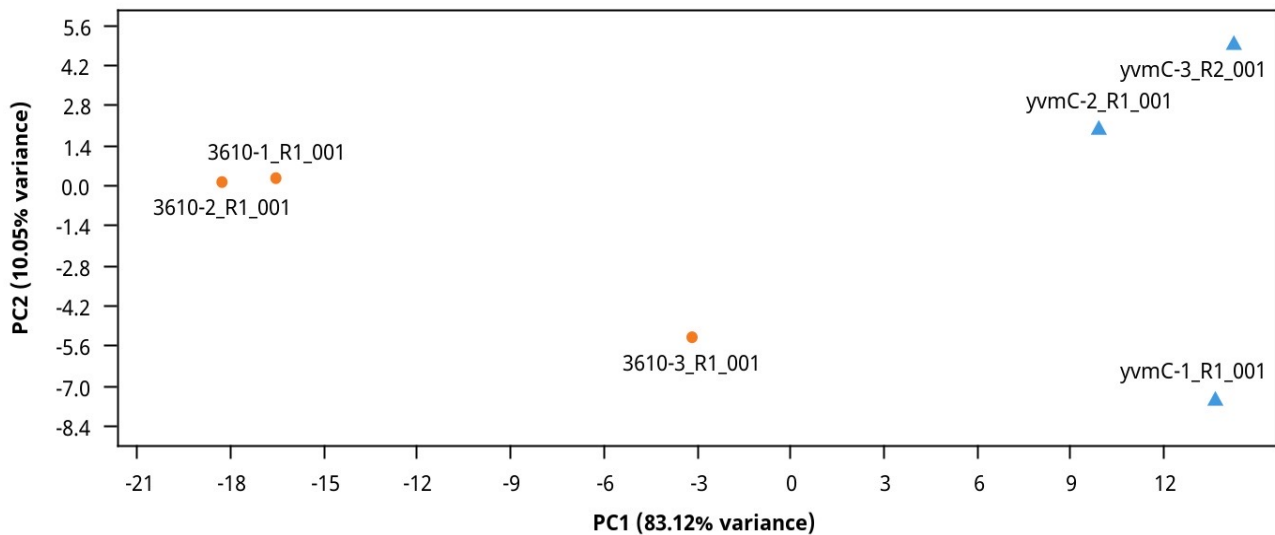

**Supplemental Figure 5: Principal Component Analysis carried out with expression of 4,237 genes.** Two principal components (PCs) with most of the variation are shown. PC1 (83.12%) separates the pulcherrimin mutant ( $\Delta ycmC-cypX$ , blue triangles) from the wild type (3610, orange circles) RNA-Seq samples.

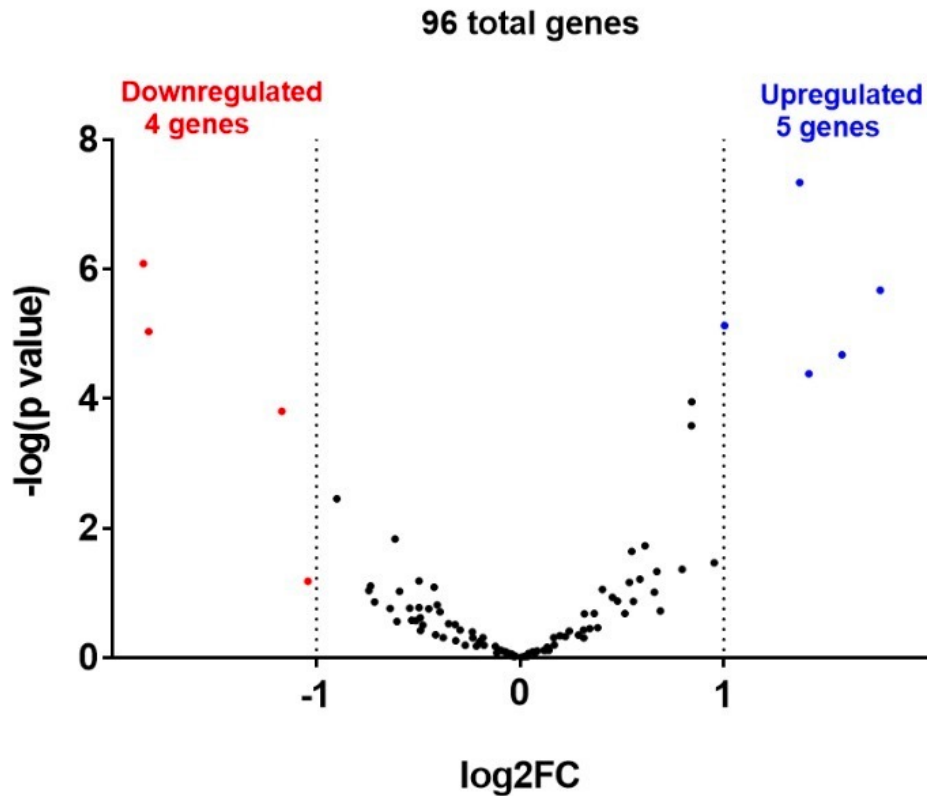

**Supplemental Figure 6: Volcano plot generated after RNA-seq analysis using pBS32 plasmid from NCIB3610 as reference.** Volcano plot depicting differentially expressed genes (blue and red dots) based on RNA-Seq analysis using pBS32 plasmid as reference (96 genes total). Downregulated genes with a log<sub>2</sub>FC of -1 or lower are depicted in red (4 total), and upregulated genes with a log<sub>2</sub>FC of 1 or higher are depicted in blue (5 total). Black dots represent genes not differentially expressed.
