# Supplementary material for: Pulcherrimin protects Bacillus subtilis against oxidative stress during biofilm development
Source: NPJ Biofilms Microbiomes. 2023 Jul 19;9:50. doi: 10.1038/s41522-023-00418-z (PMC10356805; doi:10.1038/s41522-023-00418-z)
Supplement: Supplementary file 3 — Supplemental Table 1 [file 41522_2023_418_MOESM3_ESM.xlsx]

## Sheet: Sheet1
Name	Minimum	Maximum	Gene Length	# Intervals	Direction	Differential Expression Absolute Confidence	Differential Expression Confidence	Differential Expression Log2 Ratio	Differential Expression p-value
pchR CDS	3604993	3605502	510	1	forward	34.91	-34.91	-4.77616	5.82e-39
cypX CDS	3602588	3603805	1218	1	reverse	11.24	-11.24	-4.67131	3.02e-14
pchC CDS	3603821	3604567	747	1	reverse	10.98	-10.98	-4.62498	5.73e-14
tuaE CDS	3652588	3654054	1467	1	reverse	16.25	-16.25	-4.13431	1.73e-19
pchE CDS	3605523	3606734	1212	1	forward	23.65	-23.65	-4.11225	1.59e-27
tuaB CDS	3656752	3658203	1452	1	reverse	19.36	-19.36	-4.0424	6.23e-23
tuaF CDS	3651879	3652559	681	1	reverse	16.47	-16.47	-4.03037	8.87e-20
tuaD CDS	3654139	3655524	1386	1	reverse	16.72	-16.72	-4.02178	4.55e-20
dhbF CDS	3280519	3287655	7137	1	reverse	47.64	-47.64	-4.00827	5.45e-52
tuaG CDS	3651097	3651855	759	1	reverse	18.61	-18.61	-4.00738	4.04e-22
tuaC CDS	3655586	3656755	1170	1	reverse	16.92	-16.92	-3.74924	2.56e-20
tuaH CDS	3649875	3651068	1194	1	reverse	15.92	-15.92	-3.6327	4.25e-19
dhbB CDS	3287675	3288613	939	1	reverse	23.23	-23.23	-3.58755	5.54e-27
dhbC CDS	3290289	3291485	1197	1	reverse	23.15	-23.15	-2.89693	8.39e-27
dhbE CDS	3288641	3290260	1620	1	reverse	16.31	-16.31	-2.84749	1.39e-19
pghL CDS	1915221	1915979	759	1	forward	8.23	-8.23	-2.48089	5.29e-11
fldP CDS	1488413	1488868	456	1	forward	15.02	-15.02	-2.38389	4.04e-18
yjzK CDS	1252815	1253021	207	1	forward	6.83	-6.83	-2.31112	2.7e-09
spoIVB CDS	2519102	2520382	1281	1	reverse	8.35	-8.35	-2.30274	3.68e-11
yjnA CDS	1312851	1313615	765	1	reverse	7.21	-7.21	-2.30045	9.52e-10
yjcB CDS	1252858	1253073	216	1	forward	6.75	-6.75	-2.29875	3.42e-09
yuiA CDS	3299718	3299861	144	1	reverse	11.75	-11.75	-2.29539	8.73e-15
yhjG CDS	1122862	1124361	1500	1	forward	2.64	-2.64	-2.29263	0.00032762
dhbA CDS	3291511	3292296	786	1	reverse	11.81	-11.81	-2.27426	7.36e-15
phoD CDS	284011	285762	1752	1	forward	5.92	-5.92	-2.26777	3.15e-08
yndM CDS	1916006	1916545	540	1	reverse	7.31	-7.31	-2.23304	6.84e-10
slpS CDS	1173333	1174091	759	1	forward	6.61	-6.61	-2.21707	4.93e-09
slpH CDS	1172650	1173336	687	1	forward	5.9	-5.9	-2.20873	3.38e-08
eesA CDS	179595	180347	753	1	reverse	8.58	-8.58	-2.19505	1.94e-11
ywrK CDS	3712617	3713945	1329	1	forward	7.26	-7.26	-2.18266	8.2e-10
cotNP CDS	3542943	3544286	1344	1	reverse	7.74	-7.74	-2.16864	2e-10
cotK CDS	753265	753702	438	1	forward	7.49	-7.49	-2.14993	4.3e-10
yrrD CDS	2805704	2806228	525	1	reverse	7.12	-7.12	-2.14386	1.22e-09
yqzO CDS	2693457	2693606	150	1	reverse	3.94	-3.94	-2.09422	8.99e-06
cgeD CDS	2146821	2148101	1281	1	reverse	8.23	-8.23	-2.09319	5.24e-11
besA CDS	3292490	3293359	870	1	reverse	15.16	-15.16	-2.08659	2.78e-18
yisJ CDS	1151166	1152089	924	1	reverse	6.83	-6.83	-2.07264	2.75e-09
cotA CDS	683462	685003	1542	1	reverse	6.83	-6.83	-2.06942	2.63e-09
yhfA CDS	1081413	1082804	1392	1	reverse	6.16	-6.16	-2.06506	1.7e-08
yjmC CDS	1303423	1304436	1014	1	forward	5.62	-5.62	-2.05238	7.44e-08
ykuO CDS	1487504	1488397	894	1	forward	6.8	-6.8	-2.038	3.03e-09
hypothetical protein CDS	3951824	3951958	135	1	reverse	3.84	-3.84	-2.03181	1.19e-05
ykzP CDS	1417561	1417716	156	1	forward	7.05	-7.05	-2.02042	1.47e-09
spmH CDS	798469	799233	765	1	forward	5.3	-5.3	-2.01523	2e-07
ydgB CDS	602441	602713	273	1	reverse	6.96	-6.96	-2.00813	1.89e-09
yisZ CDS	1169877	1170476	600	1	reverse	6.25	-6.25	-2.00655	1.29e-08
yhjH CDS	1124438	1124965	528	1	forward	2.04	-2.04	-2.00129	0.00171141
yjfA CDS	1282571	1283044	474	1	reverse	9.87	-9.87	-1.97969	7.98e-13
putM CDS	3372740	3373648	909	1	reverse	5.26	-5.26	-1.9746	2.26e-07
modA CDS	3425272	3426054	783	1	forward	8.14	-8.14	-1.9725	6.67e-11
prtG CDS	51680	52552	873	1	forward	5.15	-5.15	-1.9582	3.19e-07
asnO CDS	1157237	1159081	1845	1	forward	6.48	-6.48	-1.95788	6.94e-09
sspO CDS	1926306	1926452	147	1	reverse	7.66	-7.66	-1.9534	2.57e-10
cotT CDS	1280626	1280874	249	1	reverse	6.35	-6.35	-1.95322	9.91e-09
sspK CDS	928112	928264	153	1	reverse	5.29	-5.29	-1.94921	2.07e-07
ydfS CDS	601019	601726	708	1	forward	7.17	-7.17	-1.94687	1.06e-09
yhdB CDS	1010984	1011226	243	1	reverse	8.09	-8.09	-1.94518	7.68e-11
ymaG CDS	1865512	1865787	276	1	reverse	4.25	-4.25	-1.94499	3.7e-06
yqfX CDS	2590282	2590671	390	1	reverse	5.53	-5.53	-1.94365	9.64e-08
sspP CDS	1926128	1926274	147	1	reverse	6.99	-6.99	-1.94089	1.76e-09
gerT CDS	2124021	2124494	474	1	forward	5.34	-5.34	-1.92926	1.72e-07
cotP CDS	601741	602172	432	1	reverse	6.36	-6.36	-1.92339	9.55e-09
yfnE CDS	801172	802350	1179	1	forward	5.26	-5.26	-1.91828	2.29e-07
ytlC CDS	3133387	3134169	783	1	forward	5.78	-5.78	-1.91045	4.81e-08
ytwI CDS	2982603	2983067	465	1	reverse	5.31	-5.31	-1.90912	1.89e-07
cgeC CDS	2148166	2148471	306	1	reverse	4.84	-4.84	-1.90009	7.71e-07
yycP CDS	4137626	4138789	1164	1	reverse	8.98	-8.98	-1.8975	7.24e-12
yitA CDS	1170473	1171642	1170	1	reverse	5.47	-5.47	-1.89744	1.18e-07
hisG CDS	3587551	3588192	642	1	reverse	6.29	-6.29	-1.89556	1.16e-08
yxeD CDS	4066210	4066563	354	1	forward	7.83	-7.83	-1.8896	1.47e-10
ytcC CDS	3157961	3159184	1224	1	forward	4.94	-4.94	-1.88901	5.85e-07
spoVFB CDS	1745263	1745865	603	1	forward	5.57	-5.57	-1.88861	8.69e-08
yfnF CDS	800232	801143	912	1	forward	5.15	-5.15	-1.8862	3.23e-07
ylyA CDS	1616267	1616641	375	1	forward	5.53	-5.53	-1.88374	9.84e-08
yfnD CDS	802351	803286	936	1	forward	5.29	-5.29	-1.88225	2.08e-07
yuzL CDS	3372569	3372715	147	1	forward	4.78	-4.78	-1.88122	9.16e-07
ydzR CDS	599875	600105	231	1	reverse	6.75	-6.75	-1.87905	3.48e-09
exlX CDS	2032927	2033625	699	1	reverse	9.75	-9.75	-1.87828	1.1e-12
yrzR CDS	2805501	2805692	192	1	reverse	4.56	-4.56	-1.85279	1.64e-06
yodH CDS	2133455	2134156	702	1	forward	5.3	-5.3	-1.85028	2e-07
cotH CDS	3716009	3717097	1089	1	reverse	5.14	-5.14	-1.84847	3.35e-07
sgpA CDS	2843931	2844527	597	1	reverse	5.8	-5.8	-1.84208	4.52e-08
yycO CDS	4138800	4139537	738	1	reverse	7.95	-7.95	-1.83362	1.08e-10
ydgA CDS	602185	602427	243	1	reverse	5.06	-5.06	-1.83326	4.06e-07
ilvH CDS	2894733	2895251	519	1	reverse	5.26	-5.26	-1.83031	2.32e-07
cotU CDS	1901117	1901377	261	1	reverse	8.35	-8.35	-1.82476	3.67e-11
ytlD CDS	3134144	3134956	813	1	forward	4.9	-4.9	-1.82102	6.47e-07
feuC CDS	180344	181354	1011	1	reverse	6.49	-6.49	-1.81122	6.72e-09
ydfR CDS	600229	600906	678	1	reverse	5.96	-5.96	-1.80283	2.81e-08
gerPB CDS	1149958	1150191	234	1	reverse	4.4	-4.4	-1.80058	2.44e-06
spmG CDS	799240	800208	969	1	forward	4.37	-4.37	-1.79737	2.65e-06
modB CDS	3426026	3426718	693	1	forward	5.65	-5.65	-1.79365	6.68e-08
gerPA CDS	1150206	1150427	222	1	reverse	4.27	-4.27	-1.79299	3.54e-06
yjzB CDS	1207818	1208057	240	1	reverse	5.58	-5.58	-1.79096	8.32e-08
glnQ CDS	2802358	2803086	729	1	forward	6.09	-6.09	-1.78761	1.99e-08
ypuB CDS	2434143	2434346	204	1	reverse	5.92	-5.92	-1.78641	3.17e-08
spoVAA CDS	2442684	2443304	621	1	reverse	6.99	-6.99	-1.78409	1.7e-09
feuB CDS	181347	182351	1005	1	reverse	13.65	-13.65	-1.78163	1e-16
yrzQ CDS	2805348	2805479	132	1	reverse	4.21	-4.21	-1.78019	4.17e-06
fhuC CDS	3415387	3416196	810	1	reverse	8.39	-8.39	-1.7747	3.06e-11
ytcB CDS	3157008	3157958	951	1	forward	4	-4	-1.76321	7.34e-06
desE CDS	2089396	2090454	1059	1	forward	7.26	-7.26	-1.76304	8.26e-10
mpr CDS	245190	246131	942	1	forward	8.36	-8.36	-1.76231	3.39e-11
pstBA CDS	2578003	2578812	810	1	reverse	2.9	-2.9	-1.76174	0.000157199
cotJA CDS	755907	756155	249	1	forward	7.66	-7.66	-1.76167	2.65e-10
yrkC CDS	2714933	2715493	561	1	reverse	5.84	-5.84	-1.76049	4.09e-08
spoVFA CDS	1744367	1745260	894	1	forward	4.66	-4.66	-1.7529	1.23e-06
ytzL CDS	3141900	3142058	159	1	forward	5.92	-5.92	-1.7528	3.13e-08
ytdA CDS	3154735	3155553	819	1	reverse	4.88	-4.88	-1.75023	6.84e-07
ybfJ CDS	246094	246492	399	1	forward	6.21	-6.21	-1.74653	1.43e-08
ytlA CDS	3132370	3133374	1005	1	forward	5.72	-5.72	-1.74622	5.57e-08
cotB CDS	3714739	3715881	1143	1	reverse	7.5	-7.5	-1.74391	4.14e-10
splB CDS	1461770	1462798	1029	1	forward	9.68	-9.68	-1.74229	1.35e-12
yuzM CDS	3373743	3373988	246	1	forward	5.22	-5.22	-1.73708	2.58e-07
yunC CDS	3323300	3323605	306	1	reverse	4.79	-4.79	-1.73498	8.84e-07
cdoA CDS	3193863	3194348	486	1	forward	5.16	-5.16	-1.73364	3.13e-07
yitM CDS	1182448	1183032	585	1	reverse	5.06	-5.06	-1.73286	4.09e-07
cotJB CDS	756139	756402	264	1	forward	7.3	-7.3	-1.7328	7.03e-10
yhcV CDS	997175	997597	423	1	forward	5.54	-5.54	-1.72723	9.42e-08
yitB CDS	1171755	1172465	711	1	reverse	5.51	-5.51	-1.72251	1.07e-07
fhuG CDS	3416212	3417222	1011	1	reverse	7.2	-7.2	-1.72187	9.73e-10
yteA CDS	3154007	3154726	720	1	forward	5.16	-5.16	-1.71934	3.16e-07
hypothetical protein CDS	2028854	2028976	123	1	forward	6.22	-6.22	-1.71844	1.4e-08
spaC CDS	1052162	1053253	1092	1	reverse	6.5	-6.5	-1.71813	6.44e-09
cmoO CDS	3003345	3004349	1005	1	reverse	3.27	-3.27	-1.71703	5.56e-05
ytcA CDS	3155725	3157011	1287	1	forward	3.93	-3.93	-1.71582	9.09e-06
hisZ CDS	3588185	3589360	1176	1	reverse	5.34	-5.34	-1.71128	1.74e-07
amyX CDS	3061651	3063807	2157	1	reverse	5.01	-5.01	-1.70829	4.71e-07
sspJ CDS	3421465	3421605	141	1	reverse	6.77	-6.77	-1.70822	3.21e-09
ilvC CDS	2893681	2894709	1029	1	reverse	5.5	-5.5	-1.7079	1.08e-07
hlpB CDS	1148155	1148457	303	1	forward	3.91	-3.91	-1.70719	9.63e-06
cotE CDS	1775067	1775612	546	1	forward	7.39	-7.39	-1.70128	5.53e-10
yobW CDS	2084214	2084759	546	1	forward	5.42	-5.42	-1.69964	1.38e-07
sspI CDS	2931692	2931907	216	1	forward	5	-5	-1.69955	4.85e-07
pstBB CDS	2577210	2577992	783	1	reverse	1.65	-1.65	-1.69947	0.0052694
cotZ CDS	1249442	1249888	447	1	reverse	4.15	-4.15	-1.69868	4.99e-06
copP CDS	812140	812562	423	1	forward	7.66	-7.66	-1.69184	2.71e-10
spaD CDS	1050811	1052172	1362	1	reverse	6.17	-6.17	-1.69128	1.6e-08
sspT CDS	1930447	1930698	252	1	forward	4.22	-4.22	-1.69042	4.06e-06
rcmE CDS	2903217	2904035	819	1	reverse	3.3	-3.3	-1.69009	5.16e-05
yjcA CDS	1252177	1252533	357	1	forward	5.51	-5.51	-1.68929	1.05e-07
rsbS CDS	520237	520602	366	1	forward	4.86	-4.86	-1.68662	7.3e-07
yoaI CDS	2031439	2032890	1452	1	forward	7.4	-7.4	-1.68614	5.34e-10
ysmB CDS	2904043	2904483	441	1	reverse	3.27	-3.27	-1.68199	5.69e-05
ymfJ CDS	1760464	1760721	258	1	forward	6	-6	-1.67704	2.5e-08
sscA CDS	1071402	1071488	87	1	forward	3.75	-3.75	-1.66099	1.52e-05
yqfQ CDS	2595669	2596412	744	1	forward	4.19	-4.19	-1.66028	4.39e-06
yhcO CDS	989712	990680	969	1	forward	4.78	-4.78	-1.65877	9.06e-07
yosA CDS	2169807	2169926	120	1	forward	3.85	-3.85	-1.65257	1.16e-05
ykoP CDS	1400188	1400739	552	1	forward	5.56	-5.56	-1.64971	8.86e-08
yoyG CDS	2145820	2146053	234	1	reverse	3.94	-3.94	-1.64321	8.89e-06
ydzH CDS	599107	599343	237	1	reverse	3.71	-3.71	-1.63916	1.68e-05
cotS CDS	3159691	3160746	1056	1	reverse	3.94	-3.94	-1.63902	8.79e-06
bcbE CDS	1755649	1756857	1209	1	forward	4.62	-4.62	-1.634	1.39e-06
yngK CDS	1958027	1959559	1533	1	reverse	4.47	-4.47	-1.63033	2.06e-06
yjmD CDS	1304442	1305461	1020	1	forward	3.78	-3.78	-1.62688	1.39e-05
clsB CDS	3816654	3817850	1197	1	forward	6.61	-6.61	-1.62674	4.84e-09
yhzC CDS	1116583	1116816	234	1	reverse	7.66	-7.66	-1.62668	2.49e-10
ypqA CDS	2337577	2337996	420	1	forward	5.2	-5.2	-1.62627	2.79e-07
yngL CDS	1959695	1960087	393	1	reverse	3.3	-3.3	-1.62532	5.22e-05
sleC CDS	2397765	2399117	1353	1	reverse	5.01	-5.01	-1.62251	4.73e-07
yizD CDS	1233133	1233300	168	1	reverse	6.8	-6.8	-1.62202	2.99e-09
hypothetical protein CDS	1354131	1354277	147	1	forward	1.53	-1.53	-1.62057	0.0072724
yhjR CDS	1135699	1136136	438	1	reverse	7.66	-7.66	-1.61555	2.66e-10
ilvB CDS	2895248	2896972	1725	1	reverse	4.94	-4.94	-1.61111	5.69e-07
yusN CDS	3374001	3374333	333	1	forward	5.23	-5.23	-1.6105	2.5e-07
splA CDS	1461453	1461692	240	1	forward	5.47	-5.47	-1.60518	1.2e-07
ltdD CDS	1476518	1477012	495	1	reverse	4.62	-4.62	-1.60178	1.37e-06
snaA CDS	3008249	3008785	537	1	reverse	2.33	-2.33	-1.59873	0.000771919
ytlR CDS	3063833	3064762	930	1	reverse	4.6	-4.6	-1.59728	1.46e-06
cotJC CDS	756417	756986	570	1	forward	5.78	-5.78	-1.59503	4.76e-08
yhcQ CDS	990612	991265	654	1	reverse	6.38	-6.38	-1.59219	9.14e-09
glnP CDS	2804657	2805313	657	1	forward	6.07	-6.07	-1.59035	2.13e-08
leuB CDS	2891020	2892117	1098	1	reverse	3.25	-3.25	-1.59029	6e-05
yndF CDS	1910167	1911381	1215	1	forward	5.01	-5.01	-1.5901	4.76e-07
glnH CDS	2803108	2803929	822	1	forward	5.84	-5.84	-1.58806	4.09e-08
hisH CDS	3585051	3585689	639	1	reverse	6.21	-6.21	-1.58242	1.46e-08
spsC CDS	3298584	3299240	657	1	reverse	4.65	-4.65	-1.58159	1.28e-06
spoVAEB CDS	2440423	2440773	351	1	reverse	4.18	-4.18	-1.57878	4.51e-06
spoVAEA CDS	2439804	2440415	612	1	reverse	4.28	-4.28	-1.57312	3.42e-06
yraG CDS	2752802	2753047	246	1	forward	5.4	-5.4	-1.57175	1.46e-07
nadA CDS	2845955	2847061	1107	1	reverse	4.52	-4.52	-1.57169	1.81e-06
cwlJ CDS	282469	282897	429	1	forward	4.37	-4.37	-1.57134	2.7e-06
yrrI CDS	2801141	2802202	1062	1	reverse	3.94	-3.94	-1.57067	8.87e-06
yhxC CDS	1115698	1116555	858	1	forward	5.63	-5.63	-1.57032	7.06e-08
yqaN CDS	2692933	2693361	429	1	reverse	3.75	-3.75	-1.5697	1.5e-05
ykoN CDS	1398975	1400096	1122	1	reverse	5.18	-5.18	-1.56864	2.95e-07
coaE CDS	2970922	2971515	594	1	reverse	4.56	-4.56	-1.56797	1.61e-06
ypzD CDS	2435012	2435224	213	1	forward	3.86	-3.86	-1.56711	1.11e-05
ycgI CDS	337562	338158	597	1	forward	3.57	-3.57	-1.56559	2.5e-05
spoVK CDS	1874203	1875171	969	1	forward	5.32	-5.32	-1.5646	1.82e-07
gerPC CDS	1149318	1149935	618	1	reverse	3.43	-3.43	-1.56102	3.63e-05
cotD CDS	2332784	2333011	228	1	reverse	3.65	-3.65	-1.55953	1.98e-05
ybaK CDS	156109	156552	444	1	forward	4.4	-4.4	-1.55948	2.42e-06
gerPD CDS	1149145	1149321	177	1	reverse	3.69	-3.69	-1.55698	1.78e-05
yisY CDS	1169043	1169849	807	1	forward	3.9	-3.9	-1.55654	1e-05
hypothetical protein CDS	2145671	2145826	156	1	reverse	3.19	-3.19	-1.55093	7.02e-05
hypothetical protein CDS	2637179	2637328	150	1	reverse	3.6	-3.6	-1.54689	2.32e-05
ypzI CDS	2393428	2393559	132	1	forward	4.39	-4.39	-1.54576	2.5e-06
cmpA CDS	527912	528025	114	1	reverse	4.82	-4.82	-1.54549	8.2e-07
cgeB CDS	2149084	2150037	954	1	forward	3.76	-3.76	-1.54477	1.49e-05
yjcZ CDS	1253103	1253252	150	1	forward	3.41	-3.41	-1.54272	3.83e-05
yphA CDS	2392751	2393350	600	1	reverse	5.84	-5.84	-1.53982	4.03e-08
cypA CDS	2731107	2732339	1233	1	reverse	6.83	-6.83	-1.53571	2.63e-09
ytzC CDS	3119565	3119837	273	1	reverse	4.88	-4.88	-1.53477	6.91e-07
mtrA CDS	805456	806841	1386	1	reverse	3.12	-3.12	-1.53412	8.59e-05
yhcN CDS	989022	989591	570	1	forward	5.03	-5.03	-1.53211	4.47e-07
hisD CDS	3586271	3587554	1284	1	reverse	5.29	-5.29	-1.52957	2.12e-07
cotOO CDS	3159258	3159689	432	1	reverse	2.93	-2.93	-1.52674	0.00014579
ligV CDS	1406357	1407292	936	1	reverse	4.28	-4.28	-1.52168	3.42e-06
ysfB CDS	2931976	2933082	1107	1	forward	3.56	-3.56	-1.51417	2.56e-05
hisB CDS	3585690	3586274	585	1	reverse	3.61	-3.61	-1.51341	2.24e-05
exuT CDS	1307446	1308714	1269	1	forward	3.89	-3.89	-1.5099	1.04e-05
cotNE CDS	4065597	4065962	366	1	forward	3.23	-3.23	-1.50968	6.33e-05
cgeE CDS	2146013	2146792	780	1	reverse	4.95	-4.95	-1.50245	5.58e-07
yabE CDS	48629	49942	1314	1	forward	3.77	-3.77	-1.5003	1.42e-05
yvdA CDS	3561590	3562183	594	1	reverse	2.62	-2.62	-1.4945	0.000346759
uxuB CDS	1306562	1307398	837	1	forward	3.59	-3.59	-1.49355	2.35e-05
cotY CDS	1250016	1250504	489	1	reverse	3.09	-3.09	-1.49187	9.43e-05
vdhT CDS	807091	808548	1458	1	forward	4.58	-4.58	-1.48591	1.52e-06
sspN CDS	1930264	1930410	147	1	forward	3.77	-3.77	-1.4859	1.41e-05
adhB CDS	2753452	2754588	1137	1	forward	4.88	-4.88	-1.4847	6.96e-07
ykvT CDS	1448506	1449132	627	1	forward	2.87	-2.87	-1.48332	0.000172073
sscB CDS	1071613	1071699	87	1	forward	3.24	-3.24	-1.48327	6.16e-05
yutG CDS	3317502	3318002	501	1	forward	5.3	-5.3	-1.48258	2.01e-07
yozQ CDS	2029020	2029313	294	1	forward	4.51	-4.51	-1.48176	1.84e-06
amhX CDS	324038	325189	1152	1	reverse	3.79	-3.79	-1.47979	1.36e-05
yoyF CDS	2137897	2138040	144	1	forward	4.65	-4.65	-1.47189	1.25e-06
ywkF CDS	3795870	3796157	288	1	reverse	3.1	-3.1	-1.47105	9.17e-05
yfhD CDS	924210	924401	192	1	reverse	5.88	-5.88	-1.47078	3.61e-08
aspP CDS	3539165	3540727	1563	1	forward	4.94	-4.94	-1.46898	5.77e-07
gerPE CDS	1148744	1149145	402	1	reverse	3.21	-3.21	-1.467	6.71e-05
spsI CDS	3885239	3885979	741	1	reverse	3.3	-3.3	-1.45275	5.19e-05
tepJ CDS	1751935	1752147	213	1	forward	3.97	-3.97	-1.44922	8.14e-06
yqgO CDS	2573520	2573693	174	1	reverse	5.05	-5.05	-1.44884	4.2e-07
yraE CDS	2754607	2754804	198	1	forward	4.56	-4.56	-1.44869	1.61e-06
alrB CDS	1897941	1899125	1185	1	reverse	5.24	-5.24	-1.44749	2.41e-07
hisA CDS	3584317	3585054	738	1	reverse	5.61	-5.61	-1.4462	7.57e-08
sleB CDS	2399152	2400069	918	1	reverse	5.45	-5.45	-1.4454	1.27e-07
uxuA CDS	1305486	1306565	1080	1	forward	4.15	-4.15	-1.44508	4.86e-06
gerPF CDS	1148494	1148712	219	1	reverse	2.59	-2.59	-1.44456	0.0003738
hisF CDS	3583562	3584320	759	1	reverse	5.35	-5.35	-1.44345	1.67e-07
ytnM CDS	2998796	2999698	903	1	reverse	3.33	-3.33	-1.4424	4.77e-05
glnM CDS	2803990	2804640	651	1	forward	5.32	-5.32	-1.43835	1.85e-07
ynzB CDS	1907013	1907201	189	1	forward	3.7	-3.7	-1.43742	1.73e-05
gltA CDS	2010070	2014632	4563	1	reverse	3.82	-3.82	-1.43107	1.24e-05
sspE CDS	937900	938154	255	1	forward	3.24	-3.24	-1.43022	6.11e-05
thrZ CDS	3854256	3856172	1917	1	reverse	3.64	-3.64	-1.42972	2.07e-05
yjaU CDS	1205165	1205899	735	1	forward	3.42	-3.42	-1.42844	3.68e-05
yurZ CDS	3361305	3361682	378	1	reverse	4.27	-4.27	-1.42822	3.5e-06
yjaZ CDS	1210500	1211285	786	1	forward	4.07	-4.07	-1.42782	6.09e-06
gerE CDS	2904727	2904951	225	1	reverse	2.73	-2.73	-1.42636	0.000251803
ykzE CDS	1417719	1417895	177	1	forward	2.73	-2.73	-1.4261	0.000248157
ispA CDS	1386024	1386983	960	1	reverse	7.55	-7.55	-1.42323	3.62e-10
leuC CDS	2889552	2890970	1419	1	reverse	2.68	-2.68	-1.41764	0.00028734
thiN CDS	1654730	1655374	645	1	forward	3.91	-3.91	-1.41724	9.77e-06
spoVIF CDS	1253385	1253639	255	1	forward	2.67	-2.67	-1.41586	0.0002959
cotSA CDS	3160761	3161894	1134	1	reverse	3.38	-3.38	-1.41392	4.13e-05
cotX CDS	1250656	1251174	519	1	reverse	3.01	-3.01	-1.41182	0.000117316
vbfB CDS	3923920	3924228	309	1	forward	5.6	-5.6	-1.41145	7.87e-08
ypzG CDS	2329870	2330022	153	1	forward	3.43	-3.43	-1.41105	3.62e-05
glcU CDS	444461	445324	864	1	forward	4.87	-4.87	-1.40678	7.1e-07
cotQ CDS	2897788	2898123	336	1	forward	4.01	-4.01	-1.40281	7.15e-06
yycN CDS	4139679	4140149	471	1	reverse	4.37	-4.37	-1.39932	2.65e-06
bcaP CDS	1023350	1024747	1398	1	forward	3.38	-3.38	-1.39573	4.16e-05
yppG CDS	2338017	2338394	378	1	reverse	3.16	-3.16	-1.39566	7.72e-05
ykzS CDS	1448013	1448207	195	1	forward	6.46	-6.46	-1.39521	7.32e-09
ytkC CDS	3135668	3136072	405	1	reverse	3.54	-3.54	-1.39468	2.69e-05
fisB CDS	3322463	3323227	765	1	reverse	3.97	-3.97	-1.3886	8.14e-06
yhbH CDS	975231	976409	1179	1	forward	5.92	-5.92	-1.38804	3.09e-08
spoVAD CDS	2440775	2441791	1017	1	reverse	4.01	-4.01	-1.38341	7.28e-06
ytbE CDS	2970038	2970880	843	1	forward	3.49	-3.49	-1.37604	3.06e-05
ymaB CDS	1872128	1872748	621	1	forward	2.71	-2.71	-1.37568	0.000261148
yvdB CDS	3559979	3561571	1593	1	reverse	2.25	-2.25	-1.37407	0.000951915
spcF CDS	2971531	2972163	633	1	reverse	3.7	-3.7	-1.374	1.75e-05
cwlC CDS	1872812	1873579	768	1	reverse	2.74	-2.74	-1.36988	0.00023708
yetA CDS	776834	779407	2574	1	forward	3.38	-3.38	-1.36676	4.13e-05
tgl CDS	3212591	3213328	738	1	forward	3.92	-3.92	-1.36163	9.48e-06
cotM CDS	1925655	1926047	393	1	reverse	2.41	-2.41	-1.36044	0.000626876
yvdQ CDS	3542179	3542691	513	1	reverse	3.74	-3.74	-1.3597	1.57e-05
cotW CDS	1251273	1251590	318	1	reverse	2.59	-2.59	-1.35751	0.000373187
yqgE CDS	2584035	2585327	1293	1	reverse	2.83	-2.83	-1.35739	0.000191732
asd CDS	1745991	1747031	1041	1	forward	3.26	-3.26	-1.35406	5.75e-05
sspA CDS	3025445	3025654	210	1	reverse	2.74	-2.74	-1.35058	0.000242894
leuD CDS	2888940	2889539	600	1	reverse	2.65	-2.65	-1.3495	0.000316613
cgeA CDS	2148676	2149077	402	1	forward	2.77	-2.77	-1.34659	0.000223057
cmoI CDS	3003049	3003330	282	1	reverse	1.55	-1.55	-1.34565	0.00698112
sspG CDS	3354066	3354212	147	1	forward	2.89	-2.89	-1.34531	0.0001619
yozT CDS	2040988	2041227	240	1	reverse	4.98	-4.98	-1.34481	5.13e-07
hag CDS	3634987	3635901	915	1	reverse	5.29	-5.29	-1.34476	2.06e-07
cotR CDS	3544642	3545604	963	1	forward	5.15	-5.15	-1.34393	3.22e-07
ywrJ CDS	3714002	3714679	678	1	reverse	5.46	-5.46	-1.34362	1.23e-07
yqbP CDS	2672054	2672713	660	1	reverse	1.55	-1.55	-1.34241	0.0070105
yqbS CDS	2670363	2670788	426	1	reverse	1.03	-1.03	-1.34206	0.0321424
spsJ CDS	3884292	3885239	948	1	reverse	2.9	-2.9	-1.34148	0.000156084
kdgD CDS	267890	268816	927	1	forward	2.46	-2.46	-1.34106	0.000545766
yodN CDS	2138037	2138717	681	1	reverse	5.84	-5.84	-1.33959	4.08e-08
lytH CDS	3321455	3322435	981	1	forward	4.52	-4.52	-1.3392	1.79e-06
gerW CDS	3018309	3018764	456	1	reverse	4.65	-4.65	-1.33476	1.27e-06
yizC CDS	1190036	1190233	198	1	reverse	2.92	-2.92	-1.33417	0.000150443
ydfC CDS	582536	583456	921	1	reverse	2.58	-2.58	-1.33335	0.000384985
cheD CDS	1715970	1716470	501	1	forward	2.41	-2.41	-1.33314	0.000627177
mtlA CDS	449724	451160	1437	1	forward	3.25	-3.25	-1.33266	5.96e-05
yczF CDS	419763	419984	222	1	reverse	2.17	-2.17	-1.33129	0.0011764
natK CDS	294615	295571	957	1	reverse	4.01	-4.01	-1.32959	7.11e-06
cotV CDS	1251631	1252017	387	1	reverse	2.54	-2.54	-1.32733	0.000426142
feuA CDS	182370	183323	954	1	reverse	4.3	-4.3	-1.32696	3.23e-06
ypzA CDS	2308495	2308764	270	1	forward	5.27	-5.27	-1.32204	2.2e-07
oxdD CDS	2037601	2038779	1179	1	reverse	3.62	-3.62	-1.32162	2.2e-05
yraF CDS	2753065	2753433	369	1	forward	4.67	-4.67	-1.31981	1.19e-06
yurS CDS	3354212	3354487	276	1	forward	2.71	-2.71	-1.31895	0.000259949
hypR CDS	4167622	4167999	378	1	reverse	3.37	-3.37	-1.31834	4.2e-05
hisIE CDS	3582936	3583565	630	1	reverse	5.21	-5.21	-1.31817	2.63e-07
conserved hypothetical protein from phage origin CDS	1901781	1901945	165	1	forward	4.41	-4.41	-1.3149	2.35e-06
hemAT CDS	1112620	1113918	1299	1	reverse	4.85	-4.85	-1.31308	7.56e-07
tepA CDS	1751201	1751938	738	1	forward	4.03	-4.03	-1.31285	6.83e-06
hxlA CDS	375166	375798	633	1	reverse	5.55	-5.55	-1.31112	9.17e-08
cotC CDS	1904995	1905195	201	1	reverse	3.97	-3.97	-1.30924	8.22e-06
ribR CDS	3000985	3001677	693	1	reverse	2.86	-2.86	-1.30861	0.000177305
yqzM CDS	2637369	2637503	135	1	forward	3.46	-3.46	-1.30764	3.31e-05
yisU CDS	1166008	1166670	663	1	reverse	2.58	-2.58	-1.30609	0.00038424
nin CDS	371729	372127	399	1	reverse	3.22	-3.22	-1.30596	6.52e-05
ybeF CDS	235625	235873	249	1	forward	2.14	-2.14	-1.30527	0.0012863
spsF CDS	3887026	3887748	723	1	reverse	2.71	-2.71	-1.3049	0.000265403
yuiB CDS	3299344	3299664	321	1	reverse	3.99	-3.99	-1.30472	7.63e-06
yjaV CDS	1205981	1206538	558	1	forward	4.92	-4.92	-1.30325	6.11e-07
yodI CDS	2134244	2134495	252	1	forward	2.29	-2.29	-1.30296	0.000857835
spsL CDS	3882979	3883434	456	1	reverse	3.05	-3.05	-1.29978	0.000103842
yszA CDS	2869754	2869945	192	1	forward	3.29	-3.29	-1.29815	5.39e-05
yhdC CDS	1011427	1011750	324	1	forward	3.98	-3.98	-1.29757	7.89e-06
cotI CDS	3162084	3163157	1074	1	forward	3.7	-3.7	-1.29617	1.71e-05
lysCA CDS	2909520	2910746	1227	1	reverse	3.3	-3.3	-1.2959	5.12e-05
spsG CDS	3886004	3887023	1020	1	reverse	2.29	-2.29	-1.29044	0.000852681
yraD CDS	2754820	2755119	300	1	forward	3.05	-3.05	-1.28751	0.000104645
yckD CDS	369773	370105	333	1	forward	4.32	-4.32	-1.28622	3.05e-06
fhuB CDS	3417222	3418376	1155	1	reverse	3.82	-3.82	-1.28474	1.24e-05
sppO CDS	1494403	1495368	966	1	reverse	7.25	-7.25	-1.28399	8.45e-10
ilvE CDS	259016	260086	1071	1	forward	3.16	-3.16	-1.28378	7.86e-05
yjdH CDS	1277062	1277457	396	1	reverse	5.21	-5.21	-1.2822	2.65e-07
hypothetical protein CDS	2701754	2701870	117	1	forward	3.47	-3.47	-1.2806	3.23e-05
spoVR CDS	1015647	1017053	1407	1	forward	4.84	-4.84	-1.27998	7.75e-07
ymxH CDS	1743924	1744181	258	1	forward	5.65	-5.65	-1.27787	6.67e-08
ypuI CDS	2424654	2425193	540	1	reverse	3.65	-3.65	-1.27783	2.02e-05
cotG CDS	3717238	3717825	588	1	forward	4.03	-4.03	-1.27735	6.63e-06
doubtful CDS (putative in frame frameshift)	3717326	3717805	480	1	forward	4.03	-4.03	-1.27668	6.68e-06
spoVM CDS	1655446	1655526	81	1	forward	3.07	-3.07	-1.26863	9.95e-05
gerBA CDS	3688812	3690263	1452	1	forward	3.97	-3.97	-1.26742	8.22e-06
spoVAF CDS	2438372	2439853	1482	1	reverse	3.3	-3.3	-1.2671	5.07e-05
ycgL CDS	343578	344360	783	1	forward	2.99	-2.99	-1.26546	0.000122323
gerQ CDS	3893441	3893986	546	1	forward	4.03	-4.03	-1.25182	6.76e-06
ypsA CDS	2332153	2332782	630	1	reverse	2.06	-2.06	-1.25115	0.00164251
kapD CDS	3231812	3232429	618	1	reverse	3.19	-3.19	-1.24895	7.13e-05
yndA CDS	1905809	1906207	399	1	forward	4.4	-4.4	-1.24855	2.46e-06
gdh CDS	445344	446129	786	1	forward	3.15	-3.15	-1.24473	7.95e-05
spsK CDS	3883427	3884278	852	1	reverse	2.5	-2.5	-1.24471	0.000478147
ykoT CDS	1403479	1404492	1014	1	forward	4.1	-4.1	-1.24138	5.63e-06
bdhK CDS	3222195	3223367	1173	1	reverse	2.66	-2.66	-1.24113	0.000304338
yugT CDS	3214372	3216036	1665	1	reverse	5.38	-5.38	-1.24043	1.55e-07
ysoA CDS	2887817	2888821	1005	1	reverse	3.77	-3.77	-1.23713	1.45e-05
ycgH CDS	336092	337432	1341	1	reverse	3.76	-3.76	-1.23229	1.46e-05
ytwF CDS	3102201	3102512	312	1	reverse	2.59	-2.59	-1.23146	0.000379183
ylaJ CDS	1548681	1549310	630	1	reverse	4.87	-4.87	-1.22966	7.14e-07
ycgS CDS	351842	352696	855	1	reverse	4.9	-4.9	-1.22933	6.45e-07
cmoJ CDS	3001724	3003052	1329	1	reverse	2.97	-2.97	-1.22901	0.00013005
pucI CDS	3752280	3753752	1473	1	reverse	2.22	-2.22	-1.22784	0.00102579
yqzG CDS	2555519	2555845	327	1	forward	3.59	-3.59	-1.22745	2.37e-05
yesJ CDS	757111	757653	543	1	forward	5.52	-5.52	-1.22678	1.02e-07
exoA CDS	4197780	4198538	759	1	reverse	3.17	-3.17	-1.22636	7.44e-05
tex CDS	525743	527902	2160	1	forward	4.16	-4.16	-1.21972	4.78e-06
ykwB CDS	1462813	1463493	681	1	reverse	4.86	-4.86	-1.21927	7.43e-07
yqaJ CDS	2696030	2696989	960	1	reverse	3.34	-3.34	-1.21884	4.6e-05
gltB CDS	2008572	2010053	1482	1	reverse	2.92	-2.92	-1.21353	0.000149239
yxkC CDS	3989331	3989873	543	1	forward	3.22	-3.22	-1.2133	6.45e-05
gudP CDS	270396	271763	1368	1	forward	3.27	-3.27	-1.21224	5.57e-05
safA CDS	2844675	2845838	1164	1	reverse	4.27	-4.27	-1.20942	3.58e-06
yitF CDS	1174861	1175976	1116	1	reverse	3.94	-3.94	-1.20919	8.99e-06
pksF CDS	1788695	1789942	1248	1	forward	3.15	-3.15	-1.20854	8.1e-05
lipC CDS	462431	463072	642	1	forward	3.62	-3.62	-1.20819	2.15e-05
stoA CDS	1450638	1451135	498	1	forward	4.65	-4.65	-1.20634	1.28e-06
ythA CDS	3139431	3140762	1332	1	forward	2.98	-2.98	-1.20212	0.000125465
yhfW CDS	1114057	1115586	1530	1	reverse	5.46	-5.46	-1.19754	1.23e-07
yqcI CDS	2658006	2658770	765	1	reverse	3.37	-3.37	-1.1941	4.34e-05
narI CDS	3823558	3824229	672	1	reverse	2.17	-2.17	-1.19337	0.0011821
yndD CDS	1907494	1909056	1563	1	forward	3.51	-3.51	-1.193	2.93e-05
yflJ CDS	838783	838920	138	1	reverse	3.44	-3.44	-1.18653	3.51e-05
ylxF CDS	1697651	1698265	615	1	forward	3.66	-3.66	-1.18528	1.92e-05
pstA CDS	2578833	2579717	885	1	reverse	1.41	-1.41	-1.1824	0.0101794
yxbA CDS	4098150	4098419	270	1	forward	3.61	-3.61	-1.18098	2.26e-05
spsD CDS	3888862	3889731	870	1	reverse	2.13	-2.13	-1.17998	0.00135267
pksJ CDS	1792806	1807937	15132	1	forward	3.51	-3.51	-1.17749	2.93e-05
csfB CDS	35531	35725	195	1	forward	3.16	-3.16	-1.17416	7.66e-05
acpK CDS	1788469	1788717	249	1	forward	2.9	-2.9	-1.17272	0.000155152
murAB CDS	3806086	3807375	1290	1	reverse	3.5	-3.5	-1.17155	3.02e-05
yjcD CDS	1253713	1255992	2280	1	reverse	3.37	-3.37	-1.17061	4.31e-05
yozF CDS	2041330	2041827	498	1	reverse	3.99	-3.99	-1.16731	7.64e-06
sspB CDS	1050031	1050234	204	1	reverse	2.11	-2.11	-1.16721	0.00143061
ssuB CDS	961394	962161	768	1	forward	1	-1	-1.16711	0.0358403
manP CDS	1272725	1274677	1953	1	forward	3.67	-3.67	-1.16686	1.91e-05
yteV CDS	3078393	3078575	183	1	reverse	2.71	-2.71	-1.16502	0.000264783
gerKC CDS	421734	422957	1224	1	forward	3.19	-3.19	-1.16384	7.12e-05
spsC CDS	3889732	3890901	1170	1	reverse	2.19	-2.19	-1.16257	0.00111203
gerAB CDS	3392199	3393296	1098	1	forward	3.62	-3.62	-1.16197	2.18e-05
yxiM CDS	4017508	4018656	1149	1	reverse	2.15	-2.15	-1.15971	0.00124829
yitR CDS	1185608	1185901	294	1	forward	2.69	-2.69	-1.15845	0.00028325
spsE CDS	3887741	3888862	1122	1	reverse	1.91	-1.91	-1.15765	0.00250965
yvrJ CDS	3410007	3410345	339	1	forward	1.48	-1.48	-1.15696	0.00847653
yezF CDS	713308	713535	228	1	reverse	2.49	-2.49	-1.1556	0.000490439
cheW CDS	1714855	1715325	471	1	forward	2.11	-2.11	-1.15433	0.00142146
glmS CDS	200277	202079	1803	1	forward	3.22	-3.22	-1.1513	6.43e-05
yycQ CDS	4137362	4137610	249	1	reverse	2.44	-2.44	-1.14837	0.000571184
ligD CDS	1404518	1406353	1836	1	reverse	2.64	-2.64	-1.14778	0.000321408
sprB CDS	2152086	2152262	177	1	reverse	1.15	-1.15	-1.14704	0.0219811
hypothetical protein CDS	3856782	3856937	156	1	reverse	2.58	-2.58	-1.14511	0.000387613
yqfC CDS	2616667	2616948	282	1	reverse	2.28	-2.28	-1.14443	0.000889751
cotNH CDS	3316330	3317349	1020	1	reverse	3.63	-3.63	-1.14357	2.11e-05
yrbG CDS	2831124	2831780	657	1	reverse	3.44	-3.44	-1.142	3.55e-05
yunG CDS	3326803	3327150	348	1	reverse	2.98	-2.98	-1.13917	0.000126724
ctpB CDS	3622356	3623798	1443	1	reverse	2.85	-2.85	-1.13783	0.000180056
xpdC CDS	1319690	1320526	837	1	forward	2.47	-2.47	-1.13721	0.000519405
gerAA CDS	3390782	3392230	1449	1	forward	4	-4	-1.13437	7.49e-06
eglS CDS	1940625	1942124	1500	1	forward	3.16	-3.16	-1.13371	7.86e-05
ykuS CDS	1490939	1491184	246	1	forward	2.95	-2.95	-1.13233	0.000138465
sspD CDS	1413800	1413994	195	1	reverse	2.61	-2.61	-1.13204	0.000355213
sndA CDS	2999717	3000967	1251	1	reverse	2.22	-2.22	-1.13006	0.00103608
dacF CDS	2445094	2446263	1170	1	reverse	4.03	-4.03	-1.12933	6.84e-06
comS CDS	390880	391020	141	1	forward	2.82	-2.82	-1.12242	0.000197291
ureA CDS	3768791	3769108	318	1	reverse	2.68	-2.68	-1.12224	0.000284732
yxcA CDS	4091477	4091728	252	1	reverse	3.34	-3.34	-1.12154	4.63e-05
cotNW CDS	3380157	3380594	438	1	reverse	2.96	-2.96	-1.12101	0.000133129
ykoS CDS	1401772	1403466	1695	1	forward	4.14	-4.14	-1.12055	5.09e-06
alsS CDS	3709628	3711340	1713	1	reverse	1.98	-1.98	-1.11808	0.00202317
cydD CDS	3973364	3975091	1728	1	reverse	2.19	-2.19	-1.11162	0.00112165
srfAC CDS	398532	402359	3828	1	forward	2.4	-2.4	-1.10931	0.000639464
gpr CDS	2634505	2635611	1107	1	reverse	3.04	-3.04	-1.10814	0.000107349
phoB CDS	620097	621485	1389	1	reverse	3.86	-3.86	-1.10489	1.12e-05
yndH CDS	1912339	1912956	618	1	forward	3.04	-3.04	-1.10429	0.000105317
aprX CDS	1861384	1862712	1329	1	reverse	2.56	-2.56	-1.10255	0.00041069
mgtE CDS	1396013	1397368	1356	1	forward	1.65	-1.65	-1.10002	0.00521999
yoyB CDS	2098102	2098329	228	1	forward	4.07	-4.07	-1.09813	6.11e-06
fer CDS	2409729	2409977	249	1	forward	2.28	-2.28	-1.0936	0.000873529
ywqB CDS	3733852	3735462	1611	1	forward	2.46	-2.46	-1.09136	0.000536303
sspF CDS	53183	53368	186	1	forward	2.41	-2.41	-1.09019	0.000612133
yozN CDS	2098859	2099122	264	1	forward	3.87	-3.87	-1.08864	1.08e-05
tlpC CDS	372771	374492	1722	1	reverse	4.96	-4.96	-1.08769	5.44e-07
comER CDS	2641214	2642035	822	1	forward	5.49	-5.49	-1.08463	1.11e-07
ydfJ CDS	589717	591891	2175	1	forward	2.93	-2.93	-1.08424	0.000144382
pdaA CDS	869559	870350	792	1	forward	3.24	-3.24	-1.08366	6.1e-05
yonG CDS	2229988	2230908	921	1	forward	2.51	-2.51	-1.08117	0.000461243
sodF CDS	2104056	2104901	846	1	forward	3.15	-3.15	-1.07965	8.04e-05
spoIIQ CDS	3759702	3760553	852	1	reverse	4.15	-4.15	-1.07949	4.92e-06
spsA CDS	3892351	3893121	771	1	reverse	1.8	-1.8	-1.07755	0.0034012
gabT CDS	441571	442881	1311	1	forward	2.38	-2.38	-1.07646	0.00068005
yrkS CDS	2701979	2702143	165	1	reverse	2.19	-2.19	-1.07623	0.00111007
vbfA CDS	3924225	3925766	1542	1	forward	2.59	-2.59	-1.07527	0.000378084
cwlH CDS	2648903	2649655	753	1	reverse	3.2	-3.2	-1.07468	6.85e-05
yoaR CDS	2041928	2042839	912	1	reverse	3.02	-3.02	-1.07436	0.000111317
spsB CDS	3890922	3892346	1425	1	reverse	1.81	-1.81	-1.07287	0.00334478
cotIC CDS	3257693	3258061	369	1	forward	3.28	-3.28	-1.07195	5.51e-05
yqfT CDS	2593000	2593254	255	1	forward	2	-2	-1.07094	0.00195369
bioD CDS	3091492	3092187	696	1	reverse	1.72	-1.72	-1.06999	0.00432905
cheC CDS	1715344	1715973	630	1	forward	2.15	-2.15	-1.06954	0.0012548
cotF CDS	4167110	4167592	483	1	forward	2.68	-2.68	-1.06905	0.000286656
yumB CDS	3300034	3301254	1221	1	reverse	3.68	-3.68	-1.06897	1.85e-05
thrC CDS	3313770	3314828	1059	1	reverse	2.12	-2.12	-1.06714	0.00137048
spoIVA CDS	2386195	2387673	1479	1	reverse	2.78	-2.78	-1.06713	0.000217915
usd CDS	3748717	3748827	111	1	reverse	3.93	-3.93	-1.06691	9.21e-06
fliE CDS	1692130	1692450	321	1	forward	3.05	-3.05	-1.06631	0.000104126
yxnB CDS	4098423	4098905	483	1	forward	3.62	-3.62	-1.06423	2.2e-05
ydfQ CDS	598729	599067	339	1	forward	1.89	-1.89	-1.06412	0.00262575
yhfM CDS	1102560	1102955	396	1	reverse	3.11	-3.11	-1.06016	8.86e-05
tcyJ CDS	3007426	3008235	810	1	reverse	2.04	-2.04	-1.05867	0.00172506
yetH CDS	785543	785905	363	1	reverse	2.46	-2.46	-1.05844	0.00054276
yjcR CDS	1267574	1268101	528	1	forward	1.84	-1.84	-1.05736	0.00301903
yocM CDS	2098316	2098792	477	1	reverse	3.64	-3.64	-1.05629	2.04e-05
ykzM CDS	1332187	1332405	219	1	forward	1.43	-1.43	-1.05131	0.0097155
srfAD CDS	402388	403116	729	1	forward	2.42	-2.42	-1.04873	0.000597033
gucD CDS	268846	270312	1467	1	forward	1.71	-1.71	-1.04677	0.00444448
yoaH CDS	2029429	2031114	1686	1	reverse	2.94	-2.94	-1.04246	0.000142522
yugF CDS	3227581	3228402	822	1	forward	3.25	-3.25	-1.03944	5.88e-05
yitG CDS	1175985	1177253	1269	1	reverse	3.66	-3.66	-1.03667	1.92e-05
ynaI CDS	1886057	1886527	471	1	forward	4.18	-4.18	-1.03519	4.46e-06
sqhC CDS	2102168	2104066	1899	1	forward	3.8	-3.8	-1.03505	1.32e-05
glgA CDS	3166118	3167572	1455	1	reverse	3.57	-3.57	-1.03498	2.52e-05
hxlB CDS	374603	375160	558	1	reverse	3.83	-3.83	-1.03438	1.22e-05
spoVAC CDS	2441804	2442256	453	1	reverse	2.31	-2.31	-1.03296	0.000823109
srfAB CDS	387744	398495	10752	1	forward	2.17	-2.17	-1.03271	0.00119907
spoIVCA CDS	2653371	2654873	1503	1	reverse	3.56	-3.56	-1.03214	2.57e-05
gmmB CDS	2408405	2409463	1059	1	reverse	2.12	-2.12	-1.03165	0.00136313
yclG CDS	417993	419747	1755	1	forward	2.87	-2.87	-1.03087	0.000170867
dapF CDS	3306040	3306894	855	1	reverse	2.07	-2.07	-1.03037	0.00161357
yozP CDS	2246151	2246480	330	1	reverse	2.41	-2.41	-1.03028	0.000612655
yuzJ CDS	3335414	3335545	132	1	forward	2.07	-2.07	-1.02988	0.00161213
yyaN CDS	4189796	4190212	417	1	forward	2.26	-2.26	-1.02965	0.000936396
spoIIID CDS	3748421	3748702	282	1	reverse	4.37	-4.37	-1.02888	2.72e-06
yndE CDS	1909086	1910177	1092	1	forward	1.66	-1.66	-1.02688	0.00505282
tcyM CDS	3005122	3005829	708	1	reverse	1.08	-1.08	-1.02468	0.0274478
xkdK CDS	1332402	1333802	1401	1	forward	1.82	-1.82	-1.02454	0.00320153
gerKA CDS	420110	421744	1635	1	forward	2.33	-2.33	-1.02377	0.000764545
uvsE CDS	3817863	3818825	963	1	forward	3.15	-3.15	-1.02349	8.01e-05
yhfO CDS	1106003	1106452	450	1	forward	1.41	-1.41	-1.02294	0.0103494
yisN CDS	1156504	1157091	588	1	reverse	3.23	-3.23	-1.01781	6.38e-05
yyaO CDS	4189406	4189645	240	1	forward	2.07	-2.07	-1.0176	0.00156298
gerKB CDS	422982	424103	1122	1	forward	3.21	-3.21	-1.01631	6.74e-05
ywoC CDS	3755291	3755860	570	1	reverse	2.2	-2.2	-1.01464	0.00108596
fldN CDS	1487038	1487514	477	1	forward	1.68	-1.68	-1.01355	0.00472772
ylqB CDS	1671166	1671651	486	1	reverse	3.9	-3.9	-1.01292	1.01e-05
ybfA CDS	235965	236882	918	1	forward	1.52	-1.52	-1.00992	0.0076272
yxbB CDS	4097416	4098150	735	1	forward	3.3	-3.3	-1.00913	5.23e-05
yqhR CDS	2540288	2540824	537	1	reverse	2.14	-2.14	-1.00823	0.00128542
yitQ CDS	1185001	1185588	588	1	forward	1.94	-1.94	-1.00531	0.00226519
ydhF CDS	619321	620031	711	1	reverse	2.26	-2.26	-1.00262	0.000917115
fliJ CDS	1697196	1697639	444	1	forward	2.18	-2.18	-1.00236	0.00116534
yxjC CDS	4002716	4004134	1419	1	reverse	2.61	-2.61	-1.00032	0.000350344
