# Supplementary material for: Pulcherrimin protects Bacillus subtilis against oxidative stress during biofilm development
Source: NPJ Biofilms Microbiomes. 2023 Jul 19;9:50. doi: 10.1038/s41522-023-00418-z (PMC10356805; doi:10.1038/s41522-023-00418-z)
Supplement: Supplementary file 4 — Supplemental Table 2 [file 41522_2023_418_MOESM4_ESM.xlsx]

## Sheet: Sheet1
Name	Minimum	Maximum	Gene Length	# Intervals	Direction	Differential Expression Absolute Confidence	Differential Expression Confidence	Differential Expression Log2 Ratio	Differential Expression p-value
yvcB CDS	3580053	3581963	1911	1	reverse	4.3	4.3	1.00055	3.23e-06
skiZ CDS	1506105	1507298	1194	1	forward	2.46	2.46	1.00293	0.000537745
ythQ CDS	3070246	3071403	1158	1	reverse	4.56	4.56	1.00814	1.61e-06
yoqC CDS	2200376	2200783	408	1	reverse	1.28	1.28	1.00893	0.0150682
ftsX CDS	3623938	3624828	891	1	reverse	2.78	2.78	1.00977	0.000216793
rtbD CDS	4036784	4038493	1710	1	reverse	2.27	2.27	1.01	0.00089569
rsbX CDS	523650	524249	600	1	forward	2.62	2.62	1.01062	0.000347648
ctaO CDS	1279514	1280503	990	1	reverse	4.37	4.37	1.01066	2.69e-06
ykoY CDS	1410654	1411628	975	1	forward	2.74	2.74	1.01553	0.000243191
yopS CDS	2203779	2204003	225	1	forward	2.97	2.97	1.019	0.000131861
yozB CDS	2086070	2086606	537	1	reverse	3.35	3.35	1.01923	4.57e-05
ftsE CDS	3624821	3625507	687	1	reverse	2.07	2.07	1.01968	0.00158812
gcvT CDS	2548245	2549333	1089	1	reverse	1.68	1.68	1.0228	0.00475151
skiY CDS	1505416	1506108	693	1	forward	3.81	3.81	1.02427	1.27e-05
rsbU CDS	521019	522026	1008	1	forward	2.92	2.92	1.02567	0.000147354
dinL CDS	1918742	1919395	654	1	forward	2.85	2.85	1.02865	0.000181873
ylmH CDS	1611654	1612427	774	1	forward	1.75	1.75	1.02951	0.0038724
ynzC CDS	1919459	1919692	234	1	forward	1.58	1.58	1.02959	0.00627007
rok CDS	1493787	1494362	576	1	forward	2.5	2.5	1.03222	0.000476785
hutU CDS	4043574	4045232	1659	1	forward	2.66	2.66	1.03292	0.000305034
degR CDS	2308157	2308339	183	1	reverse	1.97	1.97	1.04283	0.00209961
prs CDS	57745	58698	954	1	forward	3.03	3.03	1.04323	0.000110834
fnr CDS	3831512	3832228	717	1	reverse	4.03	4.03	1.04431	6.73e-06
khtS CDS	1060988	1061326	339	1	reverse	1.68	1.68	1.0491	0.00480553
frlN CDS	3348825	3349703	879	1	reverse	1.58	1.58	1.05237	0.00625928
nirC CDS	3905333	3906103	771	1	forward	2.71	2.71	1.05481	0.000263559
yybN CDS	4173114	4173551	438	1	forward	1.85	1.85	1.06038	0.00296978
grpE CDS	2627971	2628534	564	1	reverse	4.18	4.18	1.06218	4.5e-06
recA CDS	1764645	1765691	1047	1	forward	3.7	3.7	1.06419	1.72e-05
ephM CDS	929725	930585	861	1	forward	3.13	3.13	1.06508	8.35e-05
ygzD CDS	966671	966871	201	1	reverse	2.65	2.65	1.06987	0.00031835
guaN CDS	1382677	1383147	471	1	reverse	1.87	1.87	1.07138	0.00276979
youA CDS	2241154	2241765	612	1	forward	0.91	0.91	1.07267	0.0464526
yxkH CDS	3983187	3984026	840	1	reverse	5.07	5.07	1.0727	3.96e-07
mrpA CDS	3246598	3249003	2406	1	forward	2.6	2.6	1.07342	0.000367563
guaB CDS	15915	17381	1467	1	forward	2.57	2.57	1.08751	0.000393135
ykvA CDS	1430161	1430481	321	1	reverse	3.52	3.52	1.09068	2.86e-05
nusG CDS	117890	118423	534	1	forward	3.17	3.17	1.0917	7.53e-05
fadE CDS	3367040	3368824	1785	1	reverse	3.45	3.45	1.09382	3.44e-05
aimR CDS	2208994	2210154	1161	1	reverse	4.28	4.28	1.09448	3.44e-06
tsaB CDS	642111	642800	690	1	forward	2.63	2.63	1.09872	0.000333912
bdbD CDS	3438065	3438733	669	1	reverse	5.35	5.35	1.09913	1.68e-07
yybP CDS	4169166	4169612	447	1	reverse	2.48	2.48	1.0993	0.000511041
yocC CDS	2087696	2088193	498	1	forward	1.51	1.51	1.10064	0.00774793
ykpC CDS	1516339	1516473	135	1	reverse	2.08	2.08	1.10183	0.00152308
cymR CDS	2811717	2812133	417	1	reverse	5.61	5.61	1.10195	7.62e-08
yjgC CDS	1285591	1288548	2958	1	forward	1.78	1.78	1.10407	0.00364078
lrpC CDS	476059	476493	435	1	forward	2.65	2.65	1.10585	0.000314738
yneA CDS	1918406	1918723	318	1	forward	1.9	1.9	1.10794	0.00256304
yfkT CDS	846182	847258	1077	1	reverse	2.02	2.02	1.10887	0.00185388
hemH CDS	1087250	1088182	933	1	forward	5.04	5.04	1.11042	4.34e-07
ydbL CDS	504689	505024	336	1	forward	5.65	5.65	1.11189	6.6e-08
gbsA CDS	3185092	3186564	1473	1	reverse	2.68	2.68	1.11248	0.000291609
spcB CDS	2425248	2425841	594	1	reverse	2.46	2.46	1.11833	0.000535462
ycdG CDS	306459	308144	1686	1	forward	1.98	1.98	1.12087	0.00202816
yorG CDS	2184450	2185421	972	1	reverse	1.5	1.5	1.13148	0.00808897
ydbM CDS	505152	506297	1146	1	forward	3.95	3.95	1.13229	8.6e-06
yjzJ CDS	1321848	1322027	180	1	forward	0.76	0.76	1.1353	0.072928
plsC CDS	1031395	1031994	600	1	forward	3.18	3.18	1.13579	7.19e-05
yorZ CDS	2170030	2170242	213	1	reverse	0.95	0.95	1.13788	0.0408539
upp CDS	3788426	3789055	630	1	reverse	3.57	3.57	1.14672	2.49e-05
yfhO CDS	931879	934464	2586	1	forward	1.94	1.94	1.14773	0.00231128
yfkS CDS	847282	847482	201	1	reverse	1.62	1.62	1.14824	0.00565483
lexA CDS	1917639	1918256	618	1	reverse	3.78	3.78	1.15466	1.37e-05
dnaK CDS	2626112	2627947	1836	1	reverse	5.3	5.3	1.15473	2e-07
ybzH CDS	211429	211731	303	1	forward	2.31	2.31	1.15905	0.000814492
dnaJ CDS	2624785	2625912	1128	1	reverse	5.2	5.2	1.15957	2.77e-07
yoqL CDS	2196389	2197081	693	1	reverse	5.33	5.33	1.15973	1.79e-07
hpxW CDS	3719134	3720711	1578	1	reverse	5.52	5.52	1.16203	1.02e-07
sftA CDS	3049725	3052583	2859	1	reverse	2.73	2.73	1.16347	0.000245206
yfjA CDS	889372	889686	315	1	reverse	3.01	3.01	1.16626	0.000114306
levF CDS	2761081	2761890	810	1	reverse	0.88	0.88	1.16834	0.0511581
uvrB CDS	3612945	3614930	1986	1	reverse	2.97	2.97	1.16895	0.000130376
capA CDS	3697821	3698963	1143	1	reverse	4.08	4.08	1.1766	5.81e-06
yoqB CDS	2200790	2201128	339	1	reverse	1.77	1.77	1.1826	0.00366168
ywdE CDS	3899272	3899805	534	1	reverse	3.17	3.17	1.18416	7.48e-05
levD CDS	2762395	2762835	441	1	reverse	0.9	0.9	1.18786	0.0481861
ydaF CDS	473174	473725	552	1	forward	3.7	3.7	1.18874	1.71e-05
pyrAA CDS	1622657	1623751	1095	1	forward	2.15	2.15	1.19047	0.00127662
smpB CDS	3451248	3451718	471	1	reverse	2.17	2.17	1.19149	0.00120451
yosX CDS	2156757	2157110	354	1	reverse	1.64	1.64	1.19391	0.00531174
czcD CDS	2723892	2724827	936	1	reverse	2.58	2.58	1.1951	0.000382919
yoqA CDS	2201125	2201475	351	1	reverse	1.72	1.72	1.19741	0.00428644
etfB CDS	2916378	2917151	774	1	reverse	5.18	5.18	1.19907	2.97e-07
resB CDS	2419179	2420807	1629	1	reverse	3.85	3.85	1.20141	1.14e-05
yoyD CDS	2130177	2130377	201	1	forward	1.97	1.97	1.20487	0.0021323
ptsJ CDS	4122619	4122849	231	1	reverse	2.78	2.78	1.20547	0.000217494
yorS CDS	2172932	2173450	519	1	reverse	1.18	1.18	1.20834	0.0203008
yorE CDS	2186440	2186811	372	1	reverse	1.33	1.33	1.21007	0.0130963
ymzC CDS	1867790	1868062	273	1	forward	2.67	2.67	1.21393	0.00029865
yopU CDS	2203111	2203308	198	1	reverse	2.92	2.92	1.21406	0.00014819
rsiW CDS	195426	196052	627	1	forward	3.2	3.2	1.21586	6.82e-05
yxxB CDS	4053454	4054281	828	1	reverse	2.29	2.29	1.22022	0.00085243
gamP CDS	254907	256802	1896	1	reverse	2.56	2.56	1.22419	0.000404138
tasA CDS	2553081	2553866	786	1	reverse	2.09	2.09	1.23113	0.00147598
yokE CDS	2280881	2281363	483	1	forward	1.72	1.72	1.23193	0.00429255
ywzG CDS	3900481	3900819	339	1	reverse	3.3	3.3	1.23831	5.21e-05
sigW CDS	194849	195412	564	1	forward	3.16	3.16	1.23915	7.66e-05
purU CDS	1377243	1378145	903	1	forward	5.6	5.6	1.2394	7.98e-08
groEL CDS	650234	651868	1635	1	forward	3.38	3.38	1.25437	4.11e-05
fadN CDS	3370025	3372394	2370	1	reverse	4.23	4.23	1.25687	3.96e-06
rluD CDS	1617210	1618121	912	1	forward	2.12	2.12	1.25781	0.00137458
yvdT CDS	3540717	3541406	690	1	forward	4.23	4.23	1.27115	3.97e-06
ywfA CDS	3874332	3875570	1239	1	reverse	2.46	2.46	1.27263	0.00054746
etfA CDS	2915365	2916342	978	1	reverse	4.77	4.77	1.27464	9.35e-07
yrhP CDS	2768042	2768674	633	1	reverse	3.22	3.22	1.27512	6.58e-05
sacC CDS	2758043	2760076	2034	1	reverse	1.05	1.05	1.2976	0.02967
levG CDS	2760233	2761060	828	1	reverse	1.03	1.03	1.29772	0.0326574
epsD CDS	3525250	3526395	1146	1	reverse	2.58	2.58	1.29929	0.000384511
nrdE CDS	1868969	1871071	2103	1	forward	4.07	4.07	1.3112	6.09e-06
pyrB CDS	1620476	1621390	915	1	forward	1.61	1.61	1.3113	0.0058339
amyE CDS	327618	329597	1980	1	forward	3.37	3.37	1.31831	4.21e-05
nrdF CDS	1871089	1872078	990	1	forward	5.94	5.94	1.32327	2.96e-08
gdnC CDS	1376517	1376855	339	1	forward	3.92	3.92	1.32372	9.49e-06
htpX CDS	1414997	1415893	897	1	forward	2.88	2.88	1.32744	0.000165867
mreBH CDS	1516574	1517581	1008	1	reverse	4.39	4.39	1.33761	2.54e-06
acdA CDS	3813246	3814385	1140	1	reverse	8.23	8.23	1.34423	5.02e-11
levE CDS	2761907	2762395	489	1	reverse	1.09	1.09	1.35304	0.0264721
yxiS CDS	4007803	4008093	291	1	reverse	3.37	3.37	1.35452	4.3e-05
prmA CDS	2623825	2624760	936	1	reverse	7.1	7.1	1.35497	1.31e-09
gbsR CDS	3186763	3187305	543	1	forward	3.16	3.16	1.35648	7.8e-05
fadA CDS	3368839	3370014	1176	1	reverse	6.85	6.85	1.361	2.44e-09
yqaQ CDS	2690989	2691444	456	1	reverse	1.22	1.22	1.36427	0.0181534
yrkA CDS	2718959	2720263	1305	1	reverse	2.73	2.73	1.36642	0.000248592
yopZ CDS	2201488	2201691	204	1	reverse	1.09	1.09	1.37064	0.0264384
ykvN CDS	1442347	1442703	357	1	reverse	3.72	3.72	1.39722	1.64e-05
ybfO CDS	249979	251319	1341	1	forward	3.07	3.07	1.40324	9.89e-05
fadF CDS	3814382	3816499	2118	1	reverse	5.41	5.41	1.41246	1.42e-07
yopX CDS	2201980	2202384	405	1	reverse	2.19	2.19	1.41849	0.00113314
yerA CDS	713664	715406	1743	1	forward	4.02	4.02	1.42638	7.04e-06
dck CDS	22496	23149	654	1	reverse	2.46	2.46	1.43298	0.000546877
spbT CDS	2219784	2219960	177	1	reverse	5.26	5.26	1.43792	2.28e-07
yukD CDS	3275832	3276071	240	1	reverse	3.79	3.79	1.44164	1.36e-05
dinB CDS	608246	608764	519	1	reverse	4.28	4.28	1.47413	3.37e-06
ICEBs1 mobile element: hypothetical protein CDS	532758	532886	129	1	forward	2.97	2.97	1.47575	0.000131408
yorB CDS	2187819	2188115	297	1	reverse	4.34	4.34	1.48438	2.87e-06
yosB CDS	2169497	2169676	180	1	reverse	2.4	2.4	1.50094	0.000637823
hemQ CDS	3866596	3867360	765	1	forward	6.35	6.35	1.50816	9.85e-09
yddF CDS	541248	541574	327	1	forward	2.52	2.52	1.5259	0.000452612
xis CDS	531787	531981	195	1	forward	4.3	4.3	1.53409	3.23e-06
ydzL CDS	531978	532238	261	1	forward	4.61	4.61	1.54483	1.42e-06
epsC CDS	3526407	3528203	1797	1	reverse	5.76	5.76	1.55131	5.02e-08
yebD CDS	697157	697324	168	1	forward	4.77	4.77	1.55991	9.37e-07
gdnE CDS	3987927	3988763	837	1	reverse	5.21	5.21	1.56393	2.66e-07
glpD CDS	1004975	1006642	1668	1	forward	2.55	2.55	1.5712	0.000417907
conG CDS	541578	544025	2448	1	forward	3.7	3.7	1.60026	1.7e-05
hypothetical protein CDS	2759985	2760152	168	1	reverse	2.35	2.35	1.60138	0.000736171
yorF CDS	2185504	2186418	915	1	reverse	3.04	3.04	1.61442	0.000107518
epsA CDS	3529151	3529855	705	1	reverse	3.42	3.42	1.6163	3.73e-05
ydcO CDS	532292	532552	261	1	forward	6.05	6.05	1.71682	2.22e-08
nupC CDS	4050340	4051521	1182	1	reverse	7.74	7.74	1.71949	1.95e-10
tapA CDS	2554486	2555247	762	1	reverse	4.1	4.1	1.72854	5.63e-06
cwlT CDS	544022	545011	990	1	forward	4.01	4.01	1.73393	7.21e-06
yddA CDS	536687	536995	309	1	forward	3.45	3.45	1.73888	3.44e-05
deoC CDS	4051602	4052273	672	1	reverse	8.77	8.77	1.81532	1.2e-11
yxaL CDS	4102429	4103661	1233	1	reverse	6.51	6.51	1.84706	6.31e-09
conE CDS	538734	541229	2496	1	forward	4.53	4.53	1.89874	1.75e-06
conD CDS	538322	538846	525	1	forward	5.46	5.46	1.98368	1.23e-07
conC CDS	538061	538309	249	1	forward	4.44	4.44	2.0185	2.18e-06
sipW CDS	2553930	2554502	573	1	reverse	4.49	4.49	2.03828	1.95e-06
ybfH CDS	241917	242837	921	1	reverse	16.04	16.04	2.04708	3.01e-19
yxiE CDS	4031797	4032243	447	1	reverse	4.94	4.94	2.10173	5.75e-07
frlO CDS	3349761	3351029	1269	1	reverse	4.97	4.97	2.10997	5.33e-07
gntR CDS	4113417	4114148	732	1	forward	5.63	5.63	2.14935	7.12e-08
gntP CDS	4115711	4117057	1347	1	forward	7.73	7.73	2.18184	2.06e-10
ybfI CDS	242834	243661	828	1	reverse	18.47	18.47	2.18698	6.39e-22
gntZ CDS	4117080	4118486	1407	1	forward	7.28	7.28	2.21178	7.52e-10
ydcT CDS	536404	536670	267	1	forward	5.14	5.14	2.23049	3.36e-07
gntK CDS	4114141	4115682	1542	1	forward	6.17	6.17	2.26215	1.63e-08
frlB CDS	3351110	3352096	987	1	reverse	5.19	5.19	2.32013	2.86e-07
bglP CDS	4033778	4035607	1830	1	reverse	5.18	5.18	2.36727	2.95e-07
helP CDS	532922	533302	381	1	forward	9.14	9.14	2.3873	4.77e-12
conB CDS	536985	538049	1065	1	forward	7.6	7.6	2.48272	3.17e-10
nicK CDS	534773	535831	1059	1	forward	7.78	7.78	2.48763	1.74e-10
conQ CDS	533338	534780	1443	1	forward	10.58	10.58	2.67563	1.49e-13
lctP CDS	330771	332396	1626	1	forward	4.89	4.89	2.95976	6.68e-07
bglH CDS	4032346	4033755	1410	1	reverse	7.79	7.79	2.99308	1.63e-10
cydA CDS	3977791	3979197	1407	1	reverse	15.22	15.22	3.22618	2.25e-18
lctE CDS	329774	330739	966	1	forward	6.38	6.38	3.50739	8.85e-09
